# Supplementary material
Source: publisher figshare collection journal article supplement (https://karger.figshare.com/ndownloader/files/22232709)
Supplement: Supplementary file 1 [file 22232709]

|  | B2 | | | B4 | | | 1 year after menarche onset | | |
| --- | --- | --- | --- | --- | --- | --- | --- | --- | --- |
|  | Model 1 | Model 2 | Model 3 | Model 1 | Model 2 | Model 3 | Model 1 | Model 2 | Model 3 |
|  | Coef. (95% Conf. Interval) | Coef. (95% Conf. Interval) | Coef. (95% Conf. Interval) | Coef. (95% Conf. Interval) | Coef. (95% Conf. Interval) | Coef. (95% Conf. Interval) | Coef. (95% Conf. Interval) | Coef. (95% Conf. Interval) | Coef. (95% Conf. Interval) |
| 17 OHP | -0.02 (-0.08; 0.05) | -0.02 (-0.09; 0.04) | -0.02 (-0.08; 0.05) | -0.005 (-0.06; 0.05) | -0.003 (-0.06; 0.06) | -0.002 (-0.06; 0.06) | -0.06 (-0.15; 0.01) | -0.07 (-0.15; 0.01) | -0.06 (-0.14; 0.03) |
| Androstenedione | 0.08 (0.03; 0.13) | 0.08 (0.03; 0.13) | 0.09 (0.04; 0.14) | 0.12 (0.04; 0.20) | 0.12 (0.04; 0.20) | 0.12 (0.04; 0.21) | 0.07 (-0.02; 0.16) | 0.07 (-0.02; 0.16) | 0.09 (-0.004; 0.18) |
| Testosterone | 0.02 (0.004; 0.032) | 0.02 (0.003; 0.03) | 0.02 (0.005; 0.03) | 0.02 (-0.003; 0.05) | 0.02 (0.002; 0.05) | 0.03 (0.003; 0.049) | 0.006 (-0.01; 0.03) | 0.005 (-0.02; 0.02) | 0.008 (-0.01; 0.03) |
| AMH | -0.82 (-1.41; -0.24) | -0.83 (-1.41; -0.24) | -0.73 (-1.34; -0.13) | -0.23 (-0.60; 0.15) | -0.24 (-0.61; 0.14) | -0.20 (-0.59; 0.19) | -0.001 (-0.49; 0.48) | 0.04 (-0.45; 0.53) | 0.14 (-0.36; 0.64) |
| LH | 0.05 (-0.08; 0.19) | 0.05 (-0.08; 0.19) | 0.07 (-0.08; 0.21) | 0.23 (-0.56; 1.03) | 0.24 (-0.56; 1.04) | 0.31 (-0.51; 1.14) | -0.35 (-1.07; 0.37) | -0.30 (-1.02; 0.43) | -0.21 (-0.96; 0.54) |
| FSH | -0.07 (-0.51; 0.37) | -0.08 (-0.52; 0.36) | 0.01 (-0.45; 0.46) | -0.09 (-0.55; 0.38) | -0.10 (-0.57; 0.36) | -0.09 (-0.57; 0.39) | -0.32 (-0.96; 0.33) | -0.30 (-0.96; 0.35) | -0.37 (-1.04; 0.31) |
| SHBG | -0.09 (-7.08; 6.89) | -0.45 (-7.32; 6.43) | -1.24 (-8.26; 5.78) | -2.70 (-7.42; 2.03) | -3.43 (-7.99; 1.13) | -2.35 (-6.98; 2.28) | -5.54 (-9.54; -1.54) | -4.92 (-8.79; -1.05) | -4.93 (-8.95; -0.91) |
| Estradiol | 2.28 (-1.30; 5.86) | 2.24 (-1.35; 5.83) | 2.70 (-1.02; 6.42) | 4.57 (-3.95; 13.08) | 4.75 (-3.82; 13.32) | 4.08 (-4.70; 12.87) | -6.59 (-15.55; 2.37) | -8.25 (-16.95; 0.44) | -7.76 (-16.83; 1.31) |
| FAI | 0.10 (-0.07; 0.27) | 0.10 (-0.07; 0.27) | 0.13 (-0.05; 0.30) | 0.32 (0.01; 0.64) | 0.35 (0.04; 0.66) | 0.34 (0.02; 0.67) | 0.37 (0.05; 0.69) | 0.32 (-0.0002; 0.63) | 0.36 (0.05; 0.68) |

Supplemental Table 2: Linear regression analysis between DHEAS levels around 7 years of age and hormonal and FAI profiles at B2, B4 and 1 year after menarche onset. (Model 1 adjusted for age and BMI SDS around age 7. Model 2 adjusted for model 1 and BMI at Tanner stage. Model 3 adjusted for model 2 and birthweight SDS).

(FAI: Free androgen index; B2: Breast Tanner 2; B4: Breast Tanner 4; IQR: interquartile range, SDS: standard deviation scores)
